# Supplementary material
Source: HighWire-hosted journal article supplement (http://www.ajnr.org/highwire/filestream/52272/field_highwire_adjunct_files/0/2769_table.pdf)
Supplement: 2769_table.pdf [file 2769_table.pdf]

**On-Line Table: Correlations between volumes of DGM and CASI scores<sup>a</sup>**

| Anatomic Regions | CASI Test            | Correlation (r) | P Value |
|------------------|----------------------|-----------------|---------|
| Left accumbens   | Total scores,        | 0.294           | .034    |
|                  | verbal fluency       | 0.289           | .044    |
| Left putamen     | Total scores,        | 0.466           | .000    |
|                  | mental manipulation, | 0.303           | .035    |
|                  | orientation,         | 0.347           | .015    |
|                  | abstraction,         | 0.493           | .000    |
| Left thalamus    | verbal fluency       | 0.435           | .002    |
|                  | Total scores,        | 0.315           | .020    |
|                  | attention,           | 0.285           | .047    |
| Right accumbens  | abstraction          | 0.386           | .006    |
|                  | Abstraction,         | 0.298           | .037    |
|                  | verbal fluency       | 0.367           | .009    |
| Right putamen    | Total scores,        | 0.503           | .000    |
|                  | orientation,         | 0.286           | .046    |
|                  | abstraction,         | 0.480           | .000    |
|                  | verbal fluency       | 0.372           | .008    |
| Right thalamus   | Total scores,        | 0.358           | .008    |
|                  | attention,           | 0.392           | .005    |
|                  | orientation,         | 0.292           | .042    |
|                  | abstraction,         | 0.371           | .009    |
|                  | verbal fluency       | 0.331           | .020    |

<sup>a</sup> The CASI provides quantitative assessment of attention, mental manipulation, orientation, short-term memory, long-term memory, language abilities, visual construction, verbal fluency, abstraction, and judgment.
